# Supplementary material
Source: PubMed Central journal article supplement (PMC2828176)
Supplement: 00441.2009_1.pdf [file 00441.2009_1.pdf]

**Pregnancy impairs baroreflex control of heart rate in rats: role of insulin sensitivity.**

Virginia L. Brooks,<sup>1</sup> Julia M. Mulvaney,<sup>1</sup> Afaf S. Azar,<sup>1</sup> Ding Zhao,<sup>1</sup> and Robert K. Goldman<sup>2</sup>

<sup>1</sup>Oregon Health & Science University, Department of Physiology and Pharmacology, 3181 SW Sam Jackson Park Rd, Portland, OR 97239

<sup>2</sup>Portland Veteran Affairs Medical Center, Department of Surgery, 3710 SW U.S. Veterans Hospital Rd, Portland, OR 97201

**SUPPLEMENTAL TABLES AND FIGURE**

**Supplemental Table 1: Number of sBRS sequences per hour as a function of the beat delay in rats (n=5) in the pregnant and nonpregnant state.**

| Non-Pregnant |        |        |        |         |            |         |         |         |         |
|--------------|--------|--------|--------|---------|------------|---------|---------|---------|---------|
| Light Phase  |        |        |        |         | Dark Phase |         |         |         |         |
| 1 beat       | 2 beat | 3 beat | 4 beat | 5 beat  | 1 beat     | 2 beat  | 3 beat  | 4 beat  | 5 beat  |
| 122±21       | 129±17 | 129±13 | 140±15 | 103±16* | 185±35     | 218±32* | 196±24* | 173±23* | 152±19* |
| Pregnant     |        |        |        |         |            |         |         |         |         |
| Light Phase  |        |        |        |         | Dark Phase |         |         |         |         |
| 1 beat       | 2 beat | 3 beat | 4 beat | 5 beat  | 1 beat     | 2 beat  | 3 beat  | 4 beat  | 5 beat  |
| 51±17        | 56±19  | 48±14  | 52±11  | 37±10   | 43±11      | 74±14*  | 61±12   | 35±10   | 28±9    |

Three-way ANOVA (factors are reproductive state, light-dark, and beat delay) for repeated measures revealed significant ( $P < 0.05$ ) main effects for reproductive state and beat delay. In addition, significant interactions were found between reproductive state and light-dark and between reproductive state and beat delay. Post hoc analysis indicated that the number of sequences identified when rats were pregnant was lower than when the rats were non-pregnant ( $P < 0.05$  at all times). While a diurnal variation was present in the non-pregnant state (more sequences at night,  $P < 0.05$  at all times), it was absent during pregnancy. During the light phase, the number of sequences detected was not different between beat delays, except for a 5 beat delay in non-pregnant rats, in which the number was lowest ( $P < 0.05$ ). During the dark phase, the highest number of sequences was identified with a 2 or 3 beat delay (similar for pregnant and non-pregnant state).  $P < 0.05$ , compared to numbers detected at 3-4 other beat delays within time period.

**Supplemental Table 2. sBRS (msec/mmHg) as a function of beat delay in rats (n=5) in the pregnant and nonpregnant state.**

| Non-Pregnant |           |           |           |           |            |           |           |           |           |
|--------------|-----------|-----------|-----------|-----------|------------|-----------|-----------|-----------|-----------|
| Light Phase  |           |           |           |           | Dark Phase |           |           |           |           |
| 1 beat       | 2 beat    | 3 beat    | 4 beat    | 5 beat    | 1 beat     | 2 beat    | 3 beat    | 4 beat    | 5 beat    |
| 1.68±0.16    | 1.61±0.12 | 1.61±0.16 | 1.63±0.18 | 1.57±0.17 | 1.35±0.08  | 1.33±0.08 | 1.34±0.08 | 1.39±0.06 | 1.38±0.07 |
| Pregnant     |           |           |           |           |            |           |           |           |           |
| Light Phase  |           |           |           |           | Dark Phase |           |           |           |           |
| 1 beat       | 2 beat    | 3 beat    | 4 beat    | 5 beat    | 1 beat     | 2 beat    | 3 beat    | 4 beat    | 5 beat    |
| 1.74±0.15    | 1.63±0.15 | 1.56±0.15 | 1.55±0.08 | 1.63±0.15 | 1.45±0.23  | 1.27±0.14 | 1.24±0.13 | 1.33±0.16 | 1.30±0.16 |

Three-way ANOVA (factors are reproductive state, light-dark, and beat delay) for repeated measures revealed significant ( $P < 0.05$ ) main effects only for beat delay, which probably reflects the tendency for differences between a 1 and 5 beat delay. However, posthoc analysis did not reveal significant differences between beat delays within a time period. No differences between reproductive state or between the light-dark phases of the 24 hr period were detected; no significant interactions were found.

ARTERIAL PRESSURE (mmHg)

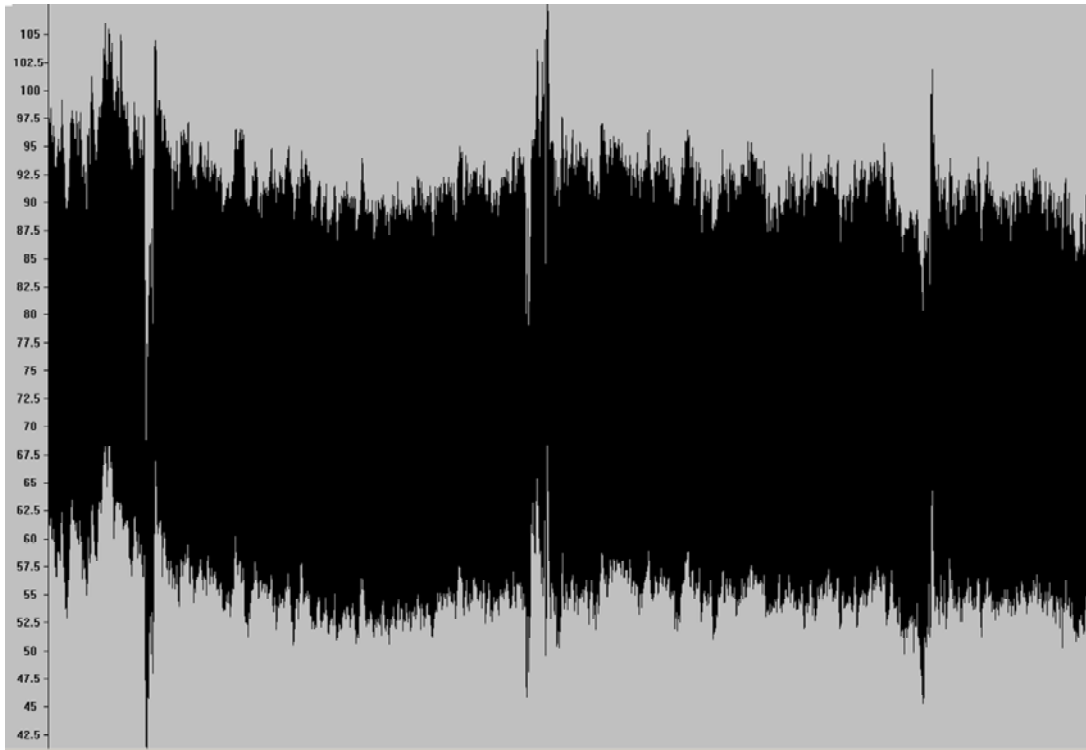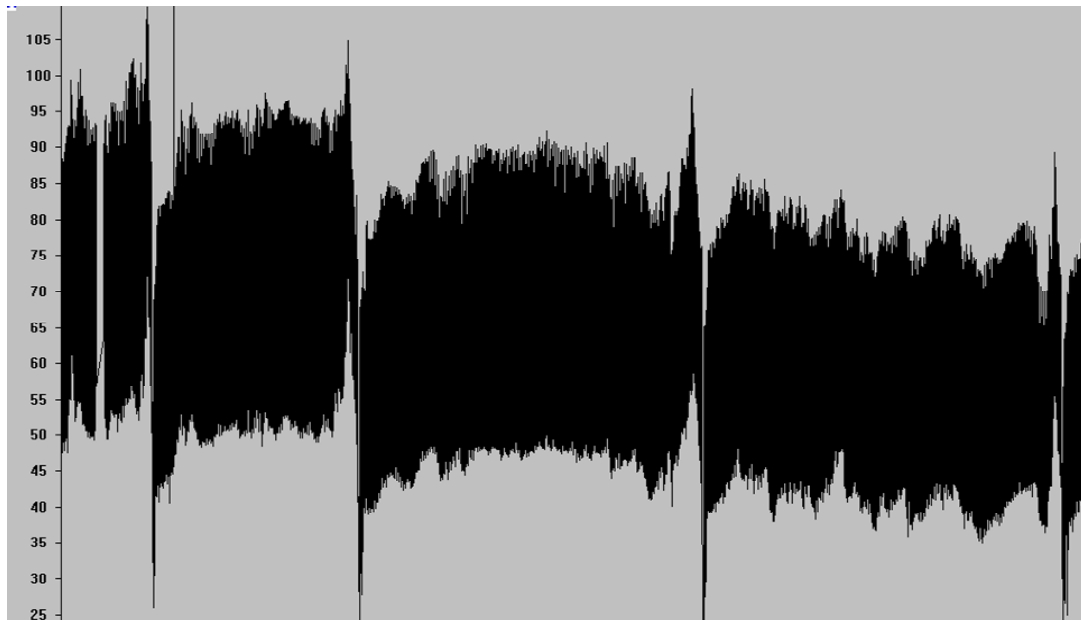

Supplemental Figure 1. Arterial pressure in two rats during labor and delivery. Periodic fluctuations in arterial pressure occurred approximately every 4 min in top rat and every 1 min in bottom rat.
